# Supplementary material
Source: PubMed Central journal article supplement (PMC4877167)
Supplement: NIHMS786764-supplement-SI.pdf [file NIHMS786764-supplement-SI.pdf]

## Supporting Information

# Facile Synthesis, Silanization and Biodistribution of Biocompatible Quantum Dots

Nan Ma, Ann F. Marshall, Sanjiv S. Gambhir, Jianghong Rao\*

\*Correspondence to Jianghong Rao (jrao@stanford.edu), Lucas Center, 1201 Welch Road, Stanford, CA 94305-5484

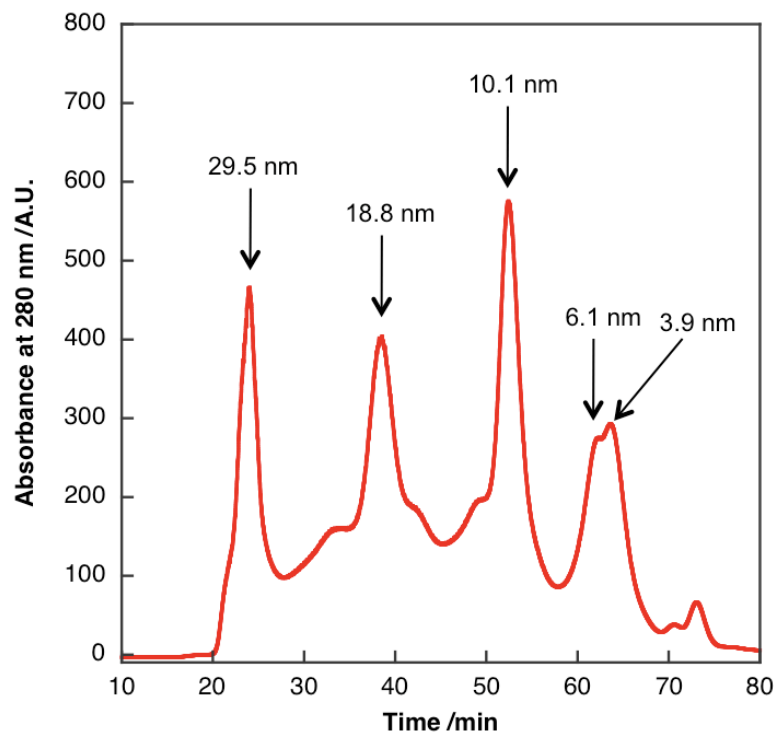

**Figure S1.** Size exclusion chromatography of protein standards including blue dextran (29.5 nm), thyroglobulin (18.8 nm), alcohol dehydrogenase (10.1 nm), ovalbumin (6.1 nm), and lysozyme (3.9 nm).

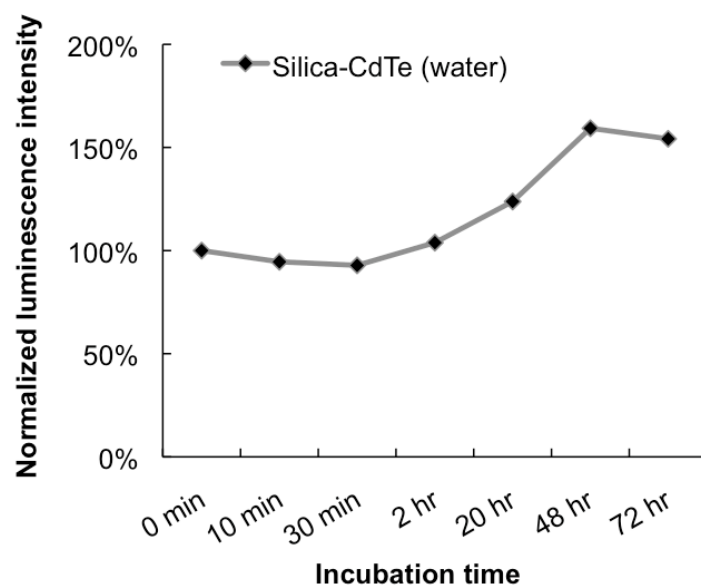

**Figure S2.** Stability of silica-coated QDs in water. QDs were incubated in water at 37 °C over a 72-hr time course. The stability of QDs were evaluated by monitoring the change of luminescence intensity during incubation.

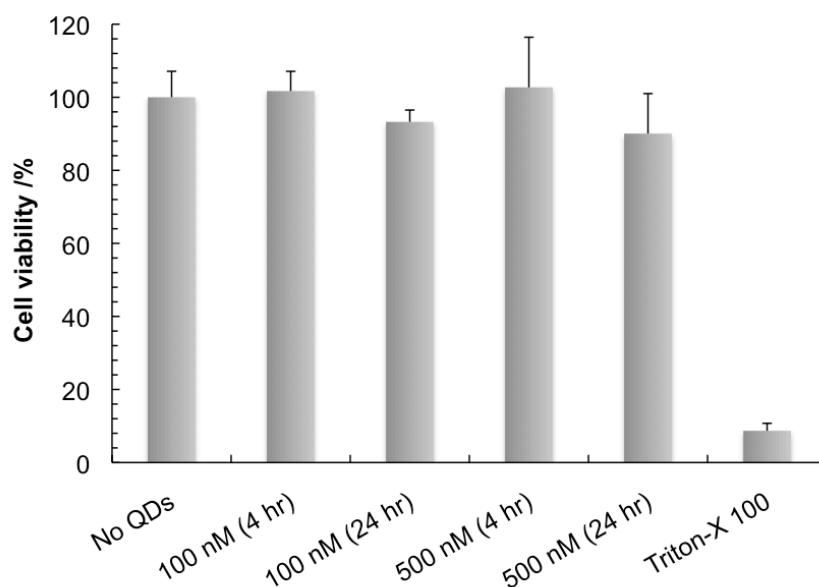

**Figure S3.** Cytotoxicity of silica-coated QDs. HeLa cells were incubated with 100 nM and 500 nM QDs for 4 hr and 24 hr and the cell viabilities were measured using a CCK-8 assay.

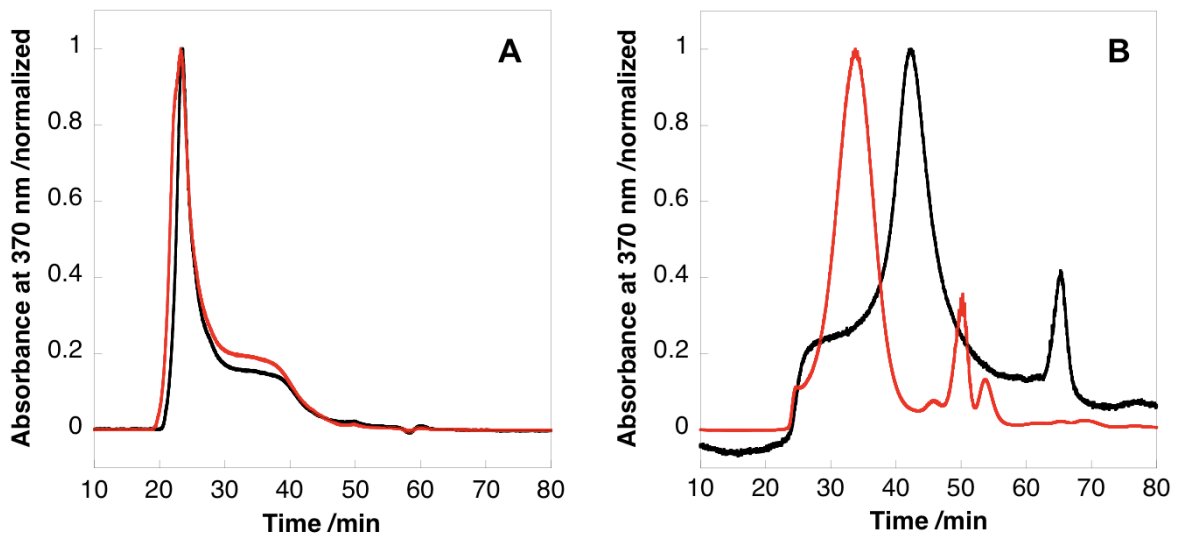

**Figure S4.** Non-specific adsorption of silica-coated QDs (A) and Invitrogen QD605 (B) with serum proteins characterized by size exclusion chromatography (black: original QDs; red: QDs incubated with FBS). 500 nM QDs were mixed with equal volume of 100% fetal bovine serum (FBS final concentration: 50%) and incubated for 4 hours at 37 °C.

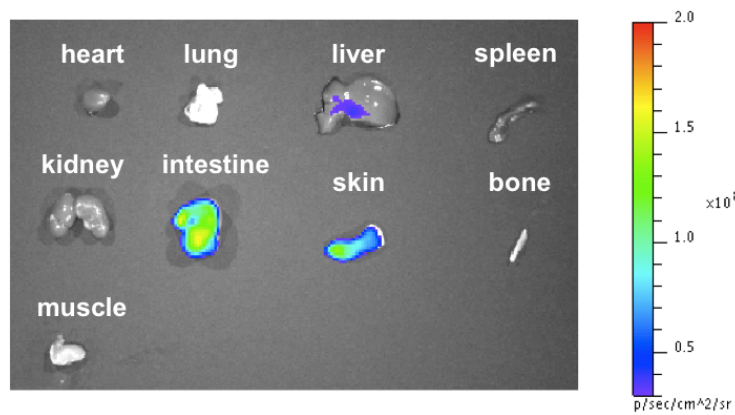

**Figure S5.** Fluorescence image of organs and tissues excised from the mouse injected with 1X PBS.

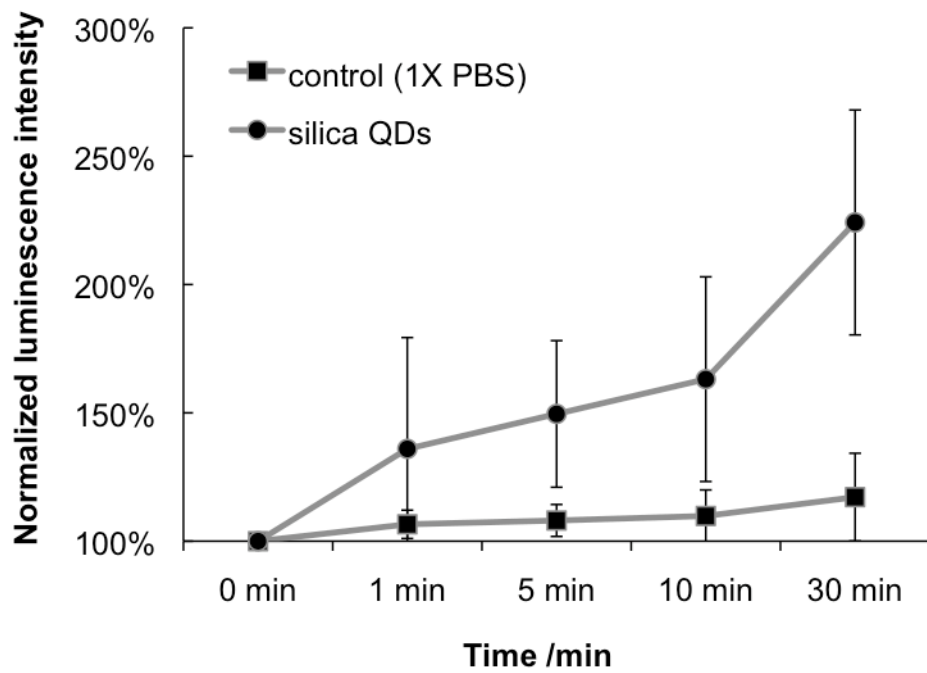

**Figure S6.** A comparison of the bladder fluorescence of the mouse injected with silica-coated QDs and the mouse injected with 1X PBS.
